# Supplementary material for: Association Between Acceptable Walking Time and Moderate-intensity Physical Activity Among Japanese Office Workers: A Cross-sectional Validation Study
Source: Research Square preprint supplement (doi:10.21203/rs.3.rs-7737707/v1), 2025-11-21
Supplement: Supplementary file 1 [file b70c51ffbd9a39ffcc3a8c70.xlsx]

## Sheet: Table S1
Supplementary Table S1. Characteristics of Study Participants (N=95)
Characteristic			n (%)/mean (SD)
All day a
		Wear time (min)	1025.46	177.857
	Physical activity(min/d)
		Sedentary	759.202	165.277
		Light	245.899	51.0157
		Moderate	20.1691	13.2323
		Vigorous	0.17401	1.22691
	Step count (/d)		5831.36	1651.44
Work day
		Wear time (min)	1002.7	186.168
	Physical activity(min/d)
		Sedentary	744.149	172.03
		Light	237.822	54.0735
		Moderate	20.568	15.6363
		Vigorous	0.1579	0.61447
	Step count (/d)		5984.5	1948.1
Non-work day a
		Wear time (min)	974.43	210.329
	Physical activity(min/d)
		Sedentary	709.477	205.152
		Light	248.383	78.0161
		Moderate	16.3265	15.3038
		Vigorous	0.2431	1.71775
	Step count (/d)		5080.47	2570.57
a Data available for: All day & non-work day (n=72)

## Sheet: Table S2
Supplementary Table S2. Acceptable walking time by non-workday physical activity level
					Acceptable walking time
			2 min or less		3 - 5 min		6 - 10 min		11 - 15 min		16- 20 min		21 or more min		P a	P for trend b
Non-work day c
		Wear time (min)	1106.5	363.687	904.23	212.427	966.32	186.898	1061.94	209.128	975.88	195.469	917.25	249.643	0.328	0.345
	Physical activity(min/d)
		Sedentary	801.833	331.659	656.333	209.275	694.75	180.54	781.905	220.328	745.562	226.687	636.125	160.407	0.51	0.321
		Light	296.833	47.7345	234.362	50.0413	253.061	87.8647	265.738	56.4142	217.188	103.902	242.875	134.777	0.59	0.824
		Moderate	7.8333	5.79511	13.5294	7.92115	17.8785	16.3915	14.2979	16.0086	13	12.6773	38.25	25.1876	0.05	0.89
		Vigorous	0	0	0	0	0.6346	2.8445	0	0	0.125	0.35355	0	0	0.03	0.661
	Step count (/d)		5081.67	879.82	4797.68	1942.39	5376.04	2932.12	4640.39	2375.13	4253.5	2370.88	7554.5	3800.3	0.37	0.832
a Categorical variables were subjected to chi-square, continuous variables to one-way ANOVA
b The trend test was the Jonckheere-Terpstra Test
c Data available for non-work day (n=72)

## Sheet: Figure 3-4_Sensitivity Analysis
																																				y=MPA	調整=wear time, sex, age, 会社,												y=step counts
																																				q1_AWT													q1_AWT
																																				従属変数:	平均_Moderate_F												従属変数:
																																				q1_AWT	平均値	標準誤差	95% 信頼区間										q1_AWT
																																							下限	上限
																																				2分以内	14.985a,b	7.64599	-0.36481	30.3351									2分以内
																																				5分以内	21.842a	4.23533	13.3392	30.3447									5分以内
																																				10分以内	16.189a	3.34941	9.46479	22.9132									10分以内
																																				15分以内	25.803a,b	5.01584	15.7335	35.8729									15分以内
																																				20分以内	25.774a	5.39638	14.9401	36.6075									20分以内
																																				21分以上	47.057a,b	6.52714	33.9535	60.1611									21分以上
																																				a. このモデルにある共変量は、[%1 = %2:, 合計_wearTime_F = :													a. このモデルにある共変量は、[%1 = %2:, 合計_wearTime_F = :
																																				b. 修正グループ周辺平均値に基づく													b. 修正グループ周辺平均値に基づく
Figure 3. Sensitivity analysis of daily moderate physical activity time across acceptable walking time categories for work days, limited to participants with data available for both workdays and non-workdays (n=72). Data points show mean values with 95% confidence intervals, adjusted for sex, age, company, and wear time. Significant linear trend is observed for work days (linear contrast: estimat…												Figure 4. Sensitivity analysis of daily step counts across acceptable walking time categories for work days, limited to participants with data available for both workdays and non-workdays (n=72). Data points show adjusted marginal means with 95% confidence intervals, adjusted for sex, age, company, and wear time. Significant linear trend is observed for work days (linear contrast: estimate=2613.2…
																																				対比結果 (K 行列)													対比結果 (K 行列)
																																				q1_AWT 多項式対比a			従属変数										q1_AWT 多項式対比a
																																							平均_Moderate_F
																																				線型	対比推定値		19.7898										線型
																																					仮説値		0
																																					差異 (推定値 - 仮説値)		19.7898
																																					標準誤差		7.72451
																																					有意確率		0.0134063
																																					95% 平均差信頼区間	下限	4.28223
																																						上限	35.2974
																																				2 次	対比推定値		8.21716										2 次
																																					仮説値		0
																																					差異 (推定値 - 仮説値)		8.21716
																																					標準誤差		6.81603
																																					有意確率		0.233549
																																					95% 平均差信頼区間	下限	-5.46658
																																						上限	21.9009
																																				3 次	対比推定値		3.83774										3 次
																																					仮説値		0
																																					差異 (推定値 - 仮説値)		3.83774
																																					標準誤差		6.67017
																																					有意確率		0.567578
																																					95% 平均差信頼区間	下限	-9.55317
																																						上限	17.2287
																																				4次	対比推定値		-5.87318										4次
																																					仮説値		0
																																					差異 (推定値 - 仮説値)		-5.87318
																																					標準誤差		5.95107
																																					有意確率		0.328345
																																					95% 平均差信頼区間	下限	-17.8204
																																						上限	6.07409
																																				5次	対比推定値		-0.0693562										5次
																																					仮説値		0
																																					差異 (推定値 - 仮説値)		-0.0693562
																																					標準誤差		4.76429
																																					有意確率		0.988442
																																					95% 平均差信頼区間	下限	-9.63407
																																						上限	9.49536
																																				a. 距離 = 1.000, 2.000, 3.000, 4.000, 5.000, 6.000													a. 距離 = 1.000, 2.000, 3.000, 4.000, 5.000, 6.000
[truncated: 4 more columns]
